# Supplementary material for: Blood circulating bacterial DNA in hospitalized old COVID-19 patients
Source: Springer Nature journal article supplement (doi:10.1186/s12979-023-00401-4), 2023-12-18
Supplement: MOESM1 [file 26542376]

## SUPPLEMENTARY MATERIAL

**Table S1. Multivariable Cox regression analysis of associated factors with in-hospital mortality in COVID-19 patients including NLR as independent variable.**

|                                 | <u>HR</u>    | <u>95% CI</u>       | <u>p-value</u> |
|---------------------------------|--------------|---------------------|----------------|
| <u>BB-DNA</u>                   | <u>1.006</u> | <u>1.002-1.010</u>  | <u>0.002</u>   |
| <u>Age</u>                      | <u>1.079</u> | <u>0.999-1.164</u>  | <u>0.053</u>   |
| <u>Sex</u>                      | <u>0.645</u> | <u>0.293-1.420</u>  | <u>0.277</u>   |
| <u>CRP</u>                      | <u>1.105</u> | <u>1.034-1.182</u>  | <u>0.003</u>   |
| <u>NLR</u>                      | <u>1.080</u> | <u>1.044-1.118</u>  | <u>≤0.0001</u> |
| <u>Diabetes</u>                 | <u>0.921</u> | <u>0.309-2.741</u>  | <u>0.882</u>   |
| <u>Hypertension</u>             | <u>1.333</u> | <u>0.477-3.723</u>  | <u>0.584</u>   |
| <u>COPD</u>                     | <u>6.954</u> | <u>2.269-21.315</u> | <u>0.001</u>   |
| <u>IHD</u>                      | <u>1.005</u> | <u>0.340-2.970</u>  | <u>0.993</u>   |
| <u>CKD</u>                      | <u>0.521</u> | <u>0.200-1.361</u>  | <u>0.183</u>   |
| <u>Dementia</u>                 | <u>0.823</u> | <u>0.309-2.192</u>  | <u>0.696</u>   |
| <u>AF</u>                       | <u>2.812</u> | <u>1.244-6.355</u>  | <u>0.013</u>   |
| <u>Ictus</u>                    | <u>0.652</u> | <u>0.211-2.017</u>  | <u>0.458</u>   |
| <u>CFS</u>                      | <u>1.167</u> | <u>0.934-1.458</u>  | <u>0.175</u>   |
| <u>Corticosteroid treatment</u> | <u>0.528</u> | <u>0.154-1.805</u>  | <u>0.309</u>   |

C-Reactive Protein (CRP), Chronic Obstructive Pulmonary Disease (COPD); Ischemic Heart Disease (IHD); Atrial Fibrillation (AF); Chronic Kidney Disease (CKD); Clinical Frailty Scale (CFS) Confidence Interval (CI) NLR (neutrophil to lymphocyte ratio)

**Table S2. Multivariable Cox regression analysis of associated factors with in-hospital mortality in COVID-19 patients including PLR as independent variable.**

|                                 | <b><u>HR</u></b> | <b><u>95% CI</u></b> | <b><u>p-value</u></b> |
|---------------------------------|------------------|----------------------|-----------------------|
| <u>BB-DNA</u>                   | <u>1.004</u>     | <u>1.000-1.007</u>   | <u>0.032</u>          |
| <u>Age</u>                      | <u>1.102</u>     | <u>1.022-1.189</u>   | <u>0.012</u>          |
| <u>Sex</u>                      | <u>0.967</u>     | <u>0.452-2.073</u>   | <u>0.932</u>          |
| <u>CRP</u>                      | <u>1.100</u>     | <u>1.031-1.174</u>   | <u>0.004</u>          |
| <u>PLR</u>                      | <u>1.002</u>     | <u>1.001-1.004</u>   | <u>0.007</u>          |
| <u>Diabetes</u>                 | <u>1.380</u>     | <u>0.525-3.626</u>   | <u>0.514</u>          |
| <u>Hypertension</u>             | <u>1.213</u>     | <u>0.451-3.264</u>   | <u>0.752</u>          |
| <u>COPD</u>                     | <u>3.746</u>     | <u>1.364-10.286</u>  | <u>0.010</u>          |
| <u>IHD</u>                      | <u>1.391</u>     | <u>0.516-3.752</u>   | <u>0.514</u>          |
| <u>CKD</u>                      | <u>0.731</u>     | <u>0.299-1.783</u>   | <u>0.490</u>          |
| <u>Dementia</u>                 | <u>0.734</u>     | <u>0.290-1.861</u>   | <u>0.515</u>          |
| <u>AF</u>                       | <u>2.465</u>     | <u>1.120-5.426</u>   | <u>0.025</u>          |
| <u>Ictus</u>                    | <u>1.181</u>     | <u>0.410-3.402</u>   | <u>0.758</u>          |
| <u>CFS</u>                      | <u>1.079</u>     | <u>0.881-1.322</u>   | <u>0.464</u>          |
| <u>Corticosteroid treatment</u> | <u>0.746</u>     | <u>0.228-2.446</u>   | <u>0.629</u>          |

C-Reactive Protein (CRP), Chronic Obstructive Pulmonary Disease (COPD); Ischemic Heart Disease (IHD); Atrial Fibrillation (AF); Chronic Kidney Disease (CKD); Clinical Frailty Scale (CFS); Confidence Interval (CI); PLR (platelet to lymphocyte ratio)

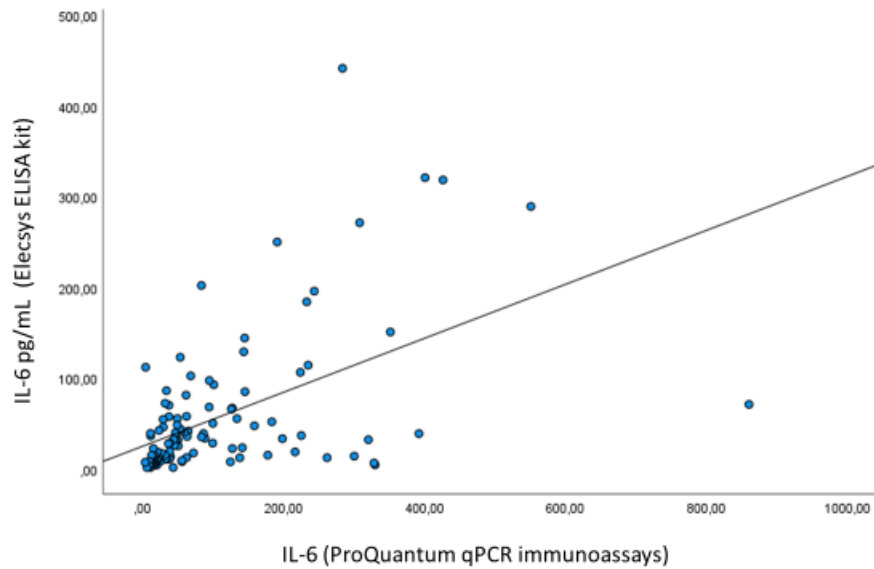

**Figure S1. Spearman correlation between IL-6 serum levels assessed using the Elecsys ELISA kit and ProQuantum qPCR immunoassays.**

Serum IL-6 levels were determined using two distinct assays: ProQuantum qPCR immunoassays (ThermoFisher Scientific) and the Elecsys IL-6 ELISA kit (Roche, Milan, Italy), which featured a detection range of 1.98-4372 pg/mL and a sensitivity of 1.5 pg/mL. Cytokine values were positively correlated with Spearman  $\rho=0.602$ ,  $p<0.0001$
